# Supplementary material for: Direct observation of dimethyl sulfide trapped by MOF proving efficient removal of sulfur impurities
Source: Royal Society of Chemistry journal article supplement (doi:10.1039/c9ra09702c), 2020-01-01
Supplement: c9ra09702c1.pdf [file c9ra09702c1.pdf]

## Supplementary information

### **Direct observation of dimethyl sulfide trapped by MOF proving efficient removal of sulfur impurities**

Masashi Morita,<sup>a, b</sup> Akira Yonezu,<sup>b</sup> Shinpei Kusaka,<sup>b</sup> Akihiro Hori,<sup>b</sup> Yunsheng Ma<sup>b</sup>  
and Ryotaro Matsuda<sup>\*b, c</sup>

<sup>a</sup> Technology Innovation Division, Panasonic Corporation, 3-1-1 Yagumo-naka-machi, Moriguchi City, Osaka 570-8501, Japan.

<sup>b</sup> Department of Chemistry and Biotechnology, School of Engineering, Nagoya University, Chikusa-ku, Nagoya 464-8603, Japan.

<sup>c</sup> Institute for Advanced Research, Nagoya University, Chikusa-ku, Nagoya 464-8603, Japan.

\*To whom correspondence should be addressed:

[ryotaro.matsuda@chembio.nagoya-u.ac.jp](mailto:ryotaro.matsuda@chembio.nagoya-u.ac.jp)

## General Procedures and Experimental section

### General Procedures

The powder X-ray diffraction patterns (PXRD) measurements were carried out on a Rigaku MiniFlex600 40 kV, 15 mA for Cu K $\alpha$  ( $\lambda = 1.5406 \text{ \AA}$ ) with a scan rate of 10 degree/min at room temperature.

Simulated powder patterns from single-crystal X-ray diffraction data were generated using Mercury 1.4.1 software.

N<sub>2</sub> adsorption measurements at 77 K were performed with BELSORP-mini (MicrotracBEL corp.). A sample was heated at 120 °C under vacuum for 6 h prior to the measurements.

The inductively coupled plasma-atomic emission spectrometry (ICP-AES) measurements were performed on an iCAP 7400 Duo (Thermo Fisher Scientific) to quantitate the silver contents in Ag–Y zeolite. A sample was heated and decomposed by adding nitric acid and hydrofluoric acid. After cooling, it was diluted with water and analyzed.

### Experimental section

#### Chemicals

##### Synthesis of HKUST-1

Cu(NO<sub>3</sub>)<sub>2</sub>·3H<sub>2</sub>O was purchased from Kanto Chemical Co., Inc., 1,3,5-benzenetricarboxylic acid (H<sub>3</sub>btc) was from Tokyo Chemical Industry, acetic acid was from FUJIFILM Wako Pure Chemical Corp., ethanol (EtOH) and *N,N*-dimethylformamide (DMF) were from Nacalai Tesque.

##### Synthesis of Cu-JAST-1

Cu(HCOO)<sub>2</sub>·4H<sub>2</sub>O and toluene were purchased from FUJIFILM Wako Pure Chemical Corp., 1,4-benzenedicarboxylic acid (H<sub>2</sub>bdc) and 1,4-diazabicyclo[2.2.2]octane (dabco) were from Tokyo Chemical Industry, methanol (MeOH) was from Nacalai Tesque and formic acid was from Kanto Chemical Co., Inc..

##### Preparation of Ag–Y zeolite

Na–Y zeolite (HSZ-320NAA) was purchased from Tosoh Corp., and 0.1 mol/L silver nitrate solution was from FUJIFILM Wako Pure Chemical Corp..

### Experimental

##### Synthesis of HKUST-1<sup>S1</sup>

An H<sub>2</sub>O (24 mL) solution of Cu(NO<sub>3</sub>)<sub>2</sub>·3H<sub>2</sub>O (2.79 g, 11.50 mmol) was mixed with a DMF (12 mL) solution of 1,3,5-benzenetricarboxylic acid (H<sub>3</sub>btc, 1.68 g, 8.00 mmol) in a 50 mL Teflon-lined

stainless steel vessel. The vessel was sealed and heated in a convection oven for 3 days at 85 °C. After cooling to room temperature, the solids were separated by filtration and washed with MeOH four times (yield: 96%). The sample was heated at 120 °C under dynamic vacuum for 6 h to yield a degassed sample. The crystal structure was determined by SXRD (Fig. S1†).

A single crystal of HKUST-1 was prepared according to the previously reported procedure.<sup>S2</sup> Cu(NO<sub>3</sub>)<sub>2</sub>·3H<sub>2</sub>O (0.49 g, 2.03 mmol) and H<sub>3</sub>btc (0.24 g, 1.14 mmol) were dissolved in a 9 mL solvent mixture of H<sub>2</sub>O:DMF:EtOH = 1:1:1 (v/v/v) with acetic acid as a modulator (12 mL) in a glass container, which was tightly capped with a Teflon vial and heated at 55 °C for 3 days. After cooling to room temperature, the resulting blue crystals were collected and soaked in EtOH for 3 days. The crystals were heated at 120 °C under vacuum for 12 h to produce a degassed sample (yield: 78%).

#### **Synthesis of Cu-JAST-1<sup>S3</sup>**

A MeOH solution (400 mL) of Cu(HCOO)<sub>2</sub>·4H<sub>2</sub>O (0.90 g, 3.99 mmol) and 8 mL of formic acid were mixed with a MeOH solution (400 mL) of 1,4-benzenedicarboxylic acid (H<sub>2</sub>bdc, 0.66 g, 3.97 mmol) in a 1000 mL glass container; the mixture was stirred at room temperature for 2 days. The precipitate was collected and put into a 100 mL Teflon-lined stainless steel vessel with a 1,4-diazabicyclo[2.2.2]octane (dabco, 0.54 g, 4.81 mmol) solution [20 mL, Toluene: MeOH = 1:1 (v/v)]. The vessel was sealed and heated in a convection oven at 120 °C for 15 h. After cooling to room temperature, the solids were filtered and washed with Toluene and MeOH (yield: 67%). The sample was heated at 120 °C under vacuum for 6 h to yield a degassed sample. The crystal structure was determined by SXRD (Fig. S2†).

#### **Preparation of Ag–Y zeolite<sup>S4</sup>**

Na–Y zeolite (2.6 g) with a SiO<sub>2</sub>/Al<sub>2</sub>O<sub>3</sub> molar ratio of 5.5 was added to a 0.1 mol/L solution of silver nitrate (100 mL) and stirred at room temperature for 24 h. Then, the precipitate was centrifuged and washed with H<sub>2</sub>O. The sample was dried under vacuum at 80 °C for 12 h and then calcined in air at 400 °C for 2 h. An ICP analysis revealed that the silver content in Ag–Y zeolite was 20.6 wt%, which was reasonable based on the cation exchange capacity of Na–Y zeolite (4.0 mmol/g) and the amount of preparation.<sup>S4</sup>

## Structure

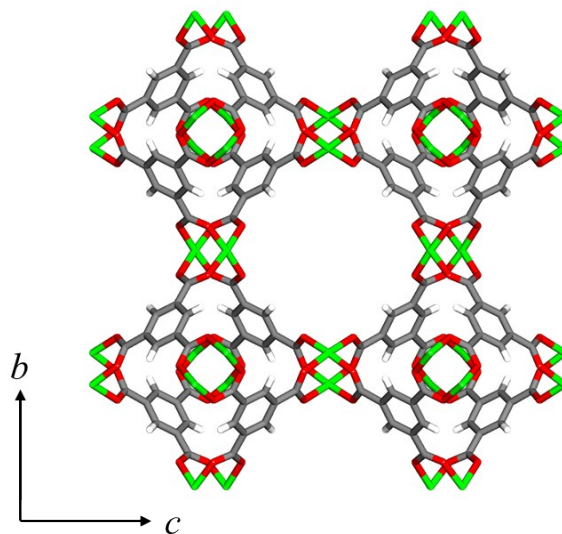

**Fig. S1.** Crystal structure of HKUST-1 (Cu, green; O, red; C, gray; H, white). Viewing along plane (100).

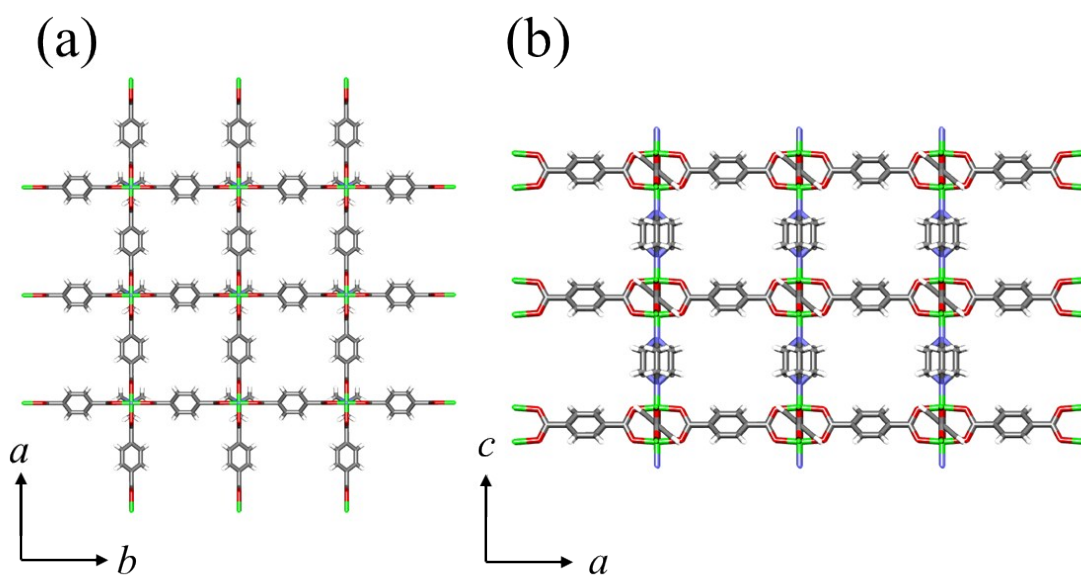

**Fig. S2.** Crystal structure of Cu-JAST-1 (Cu, green; O, red; N, purple; C, gray; H, white). Viewing along (a) plane (001) and (b) plane (010).

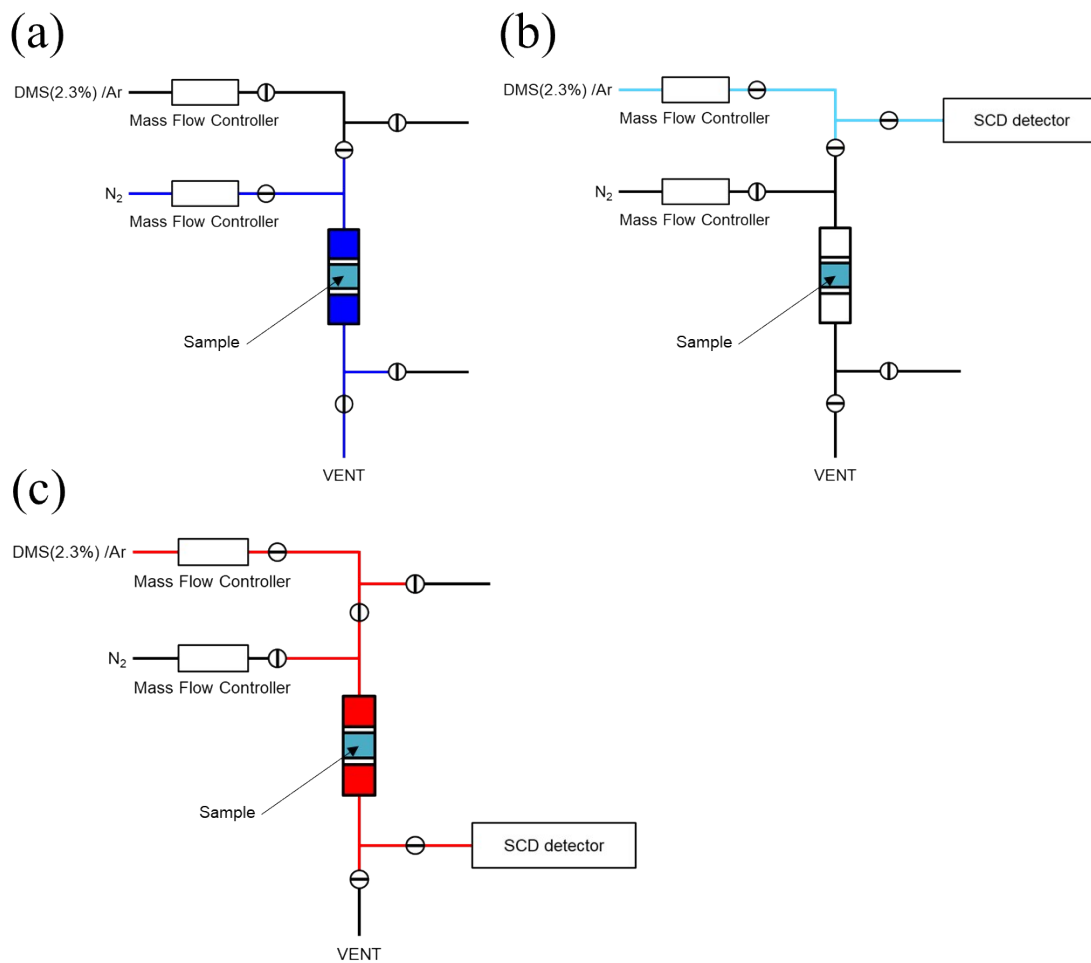

**Fig. S3.** Experimental procedure of DMS breakthrough measurements; (a) No. 1, (b) No. 2 and (c) No. 3.

- (a) No. 1. Heating the sample to obtain a degassed sample in the cell at 393 K for 12 h under N<sub>2</sub> flow.
- (b) No. 2. DMS (2.3 vol. %)/Ar gas flowing and measuring inlet sulfur concentration ( $C_0$ ).
- (c) No. 3. Setting the sample at 303 K, measuring outlet sulfur concentration at each measurement time and calculating the relative concentration ( $C/C_0$ ).

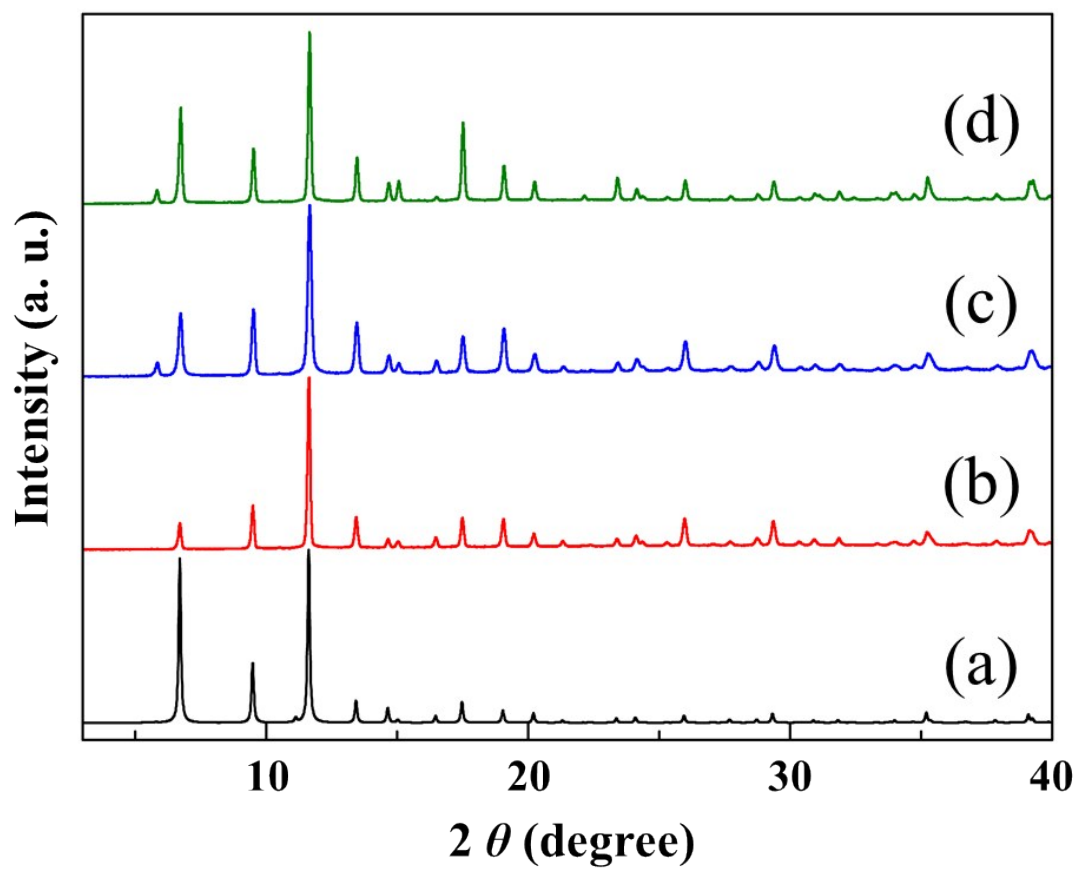

**Fig. S4.** PXRD patterns of (a) simulated HKUST-1, (b) as-synthesized HKUST-1, (c) degassed HKUST-1 and (d) DMS-adsorbed HKUST-1 after DMS breakthrough measurement.

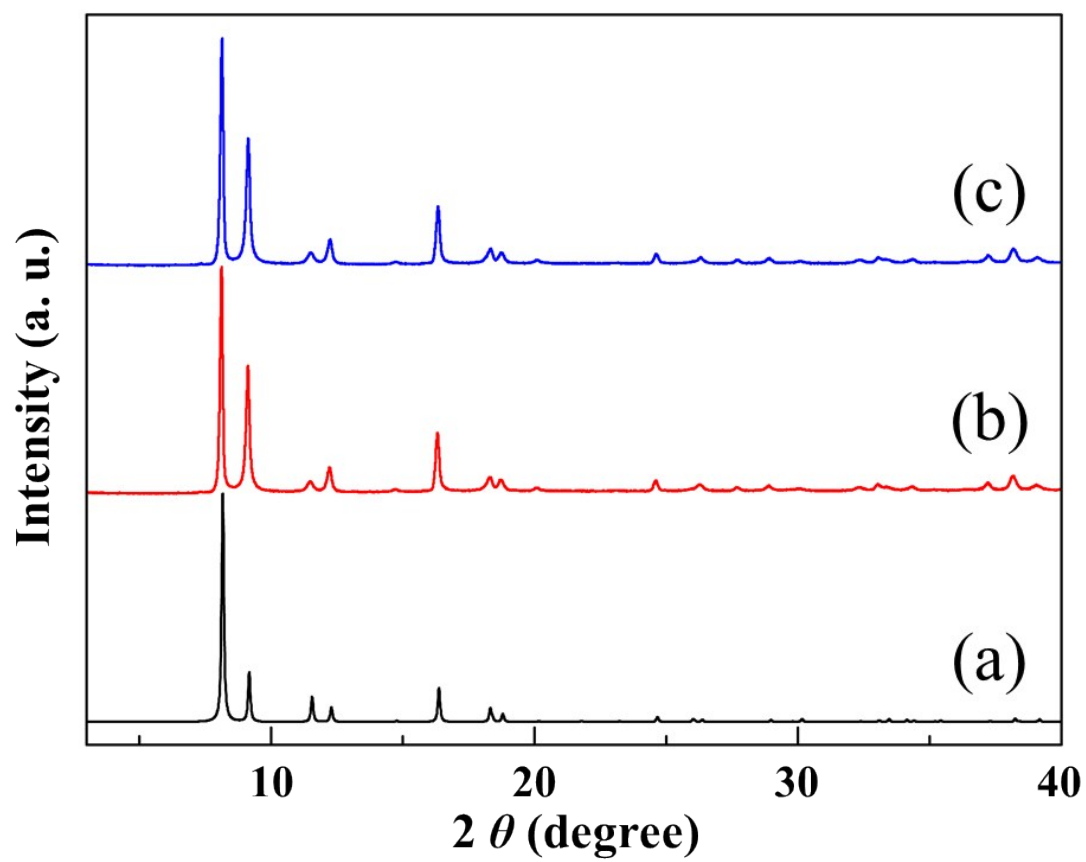

**Fig. S5.** PXRD patterns of (a) simulated Cu-JAST-1, (b) as-synthesized Cu-JAST-1 and (c) degassed Cu-JAST-1.

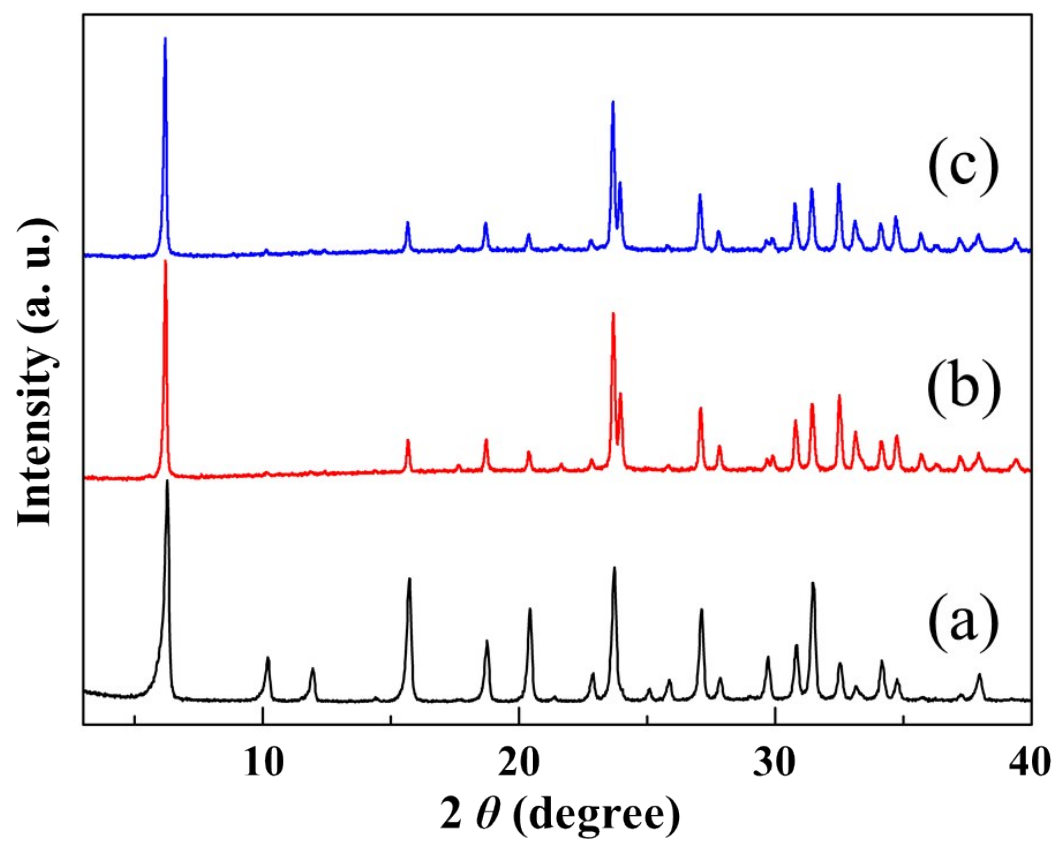

**Fig. S6.** PXRD patterns of (a) Na-Y zeolite, (b) as-synthesized Ag-Y zeolite and (c) degassed Ag-Y zeolite.

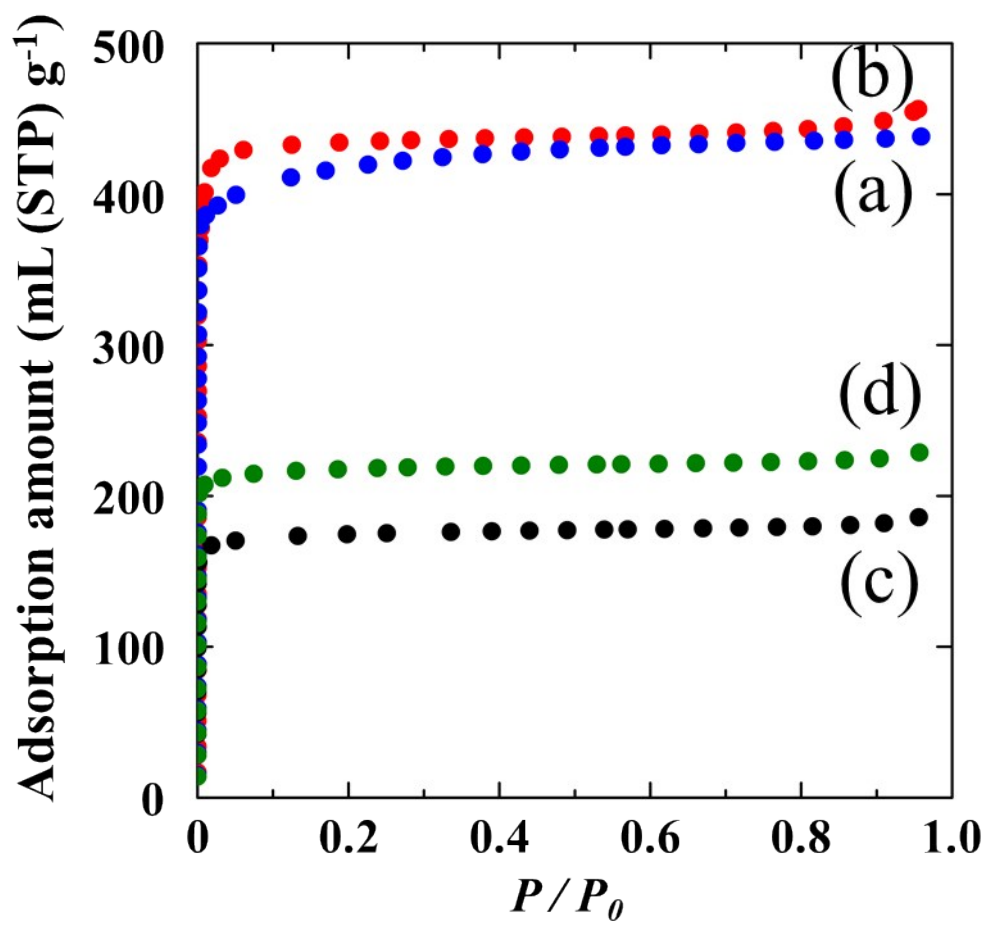

**Fig. S7.** Adsorption isotherms of  $N_2$  for (a) HKUST-1, (b) Cu-JAST-1, (c) Ag-Y zeolite and (d) Na-Y zeolite at 77 K.

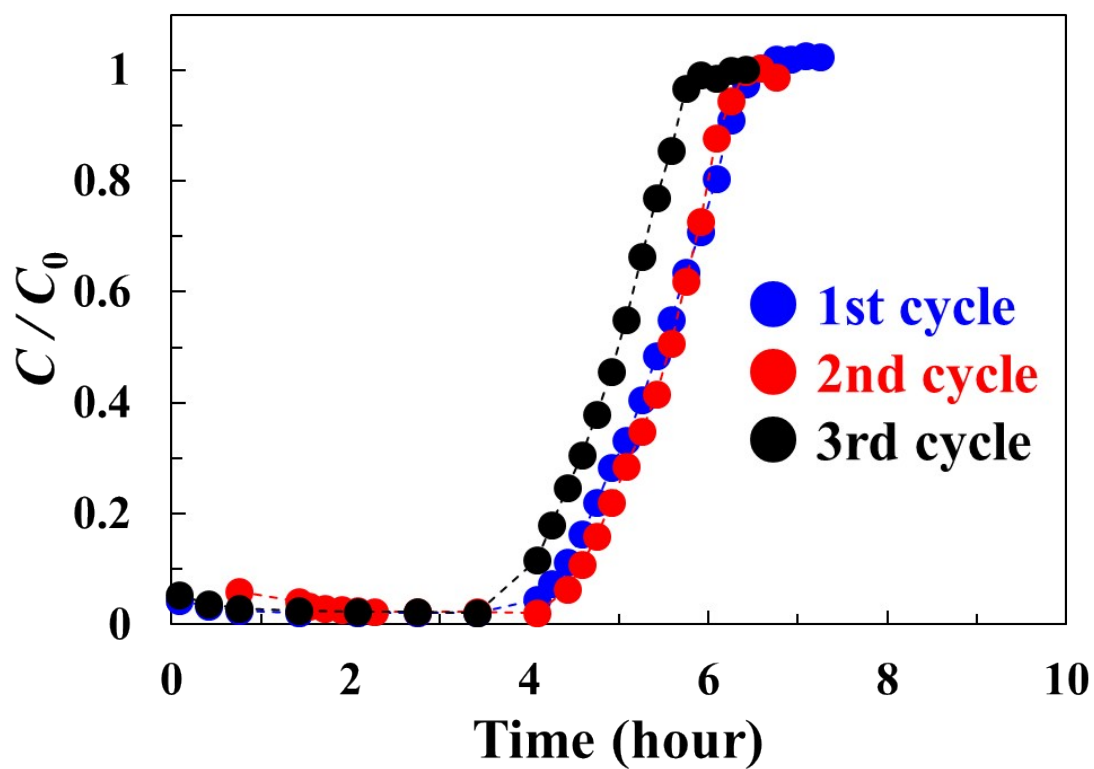

**Fig. S8.** Breakthrough curves of sulfur concentration with the flowed mixture gas of  $\text{CH}_4$  (49.7 vol.%), Ar (49.3 vol.%) and DMS (1.0 vol.%) at each DMS adsorption cycle on HKUST-1.

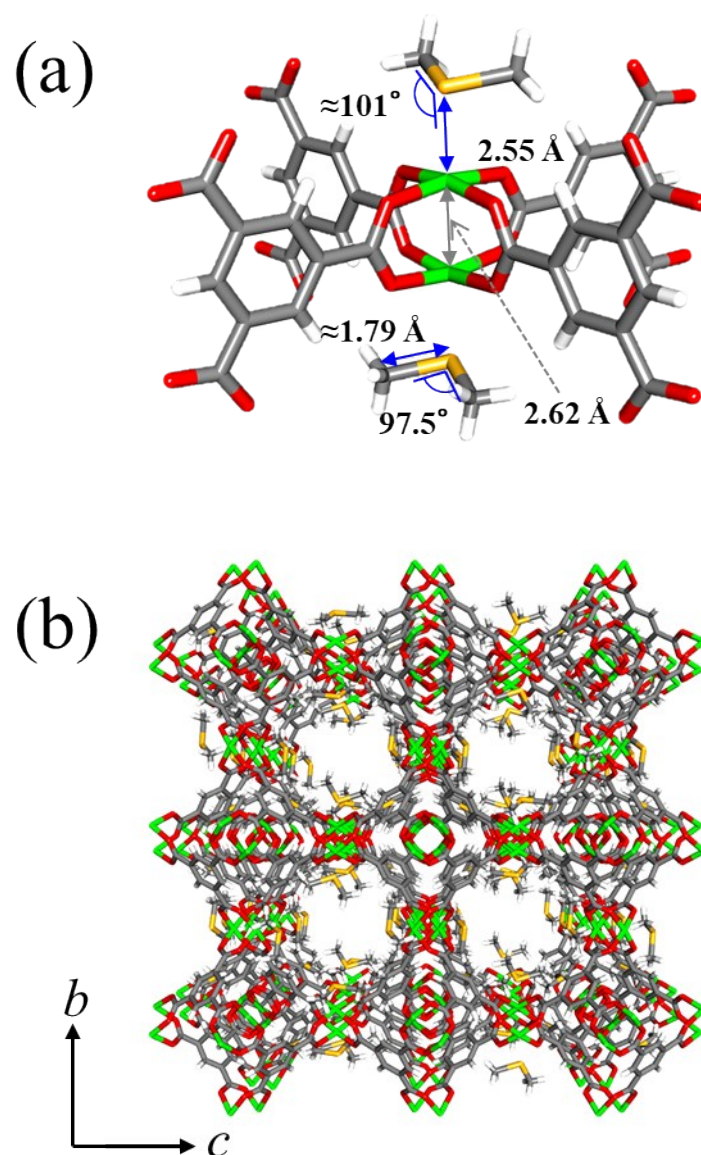

**Fig. S9.** Crystal structures of DMS-adsorbed HKUST-1. (a) Local paddle wheel structure with adsorbed DMS. (b) View of packing structure with DMS along the  $a$  axis. Atoms are colored as follows: Cu, green; O, red; C, gray; H, white; S, yellow.

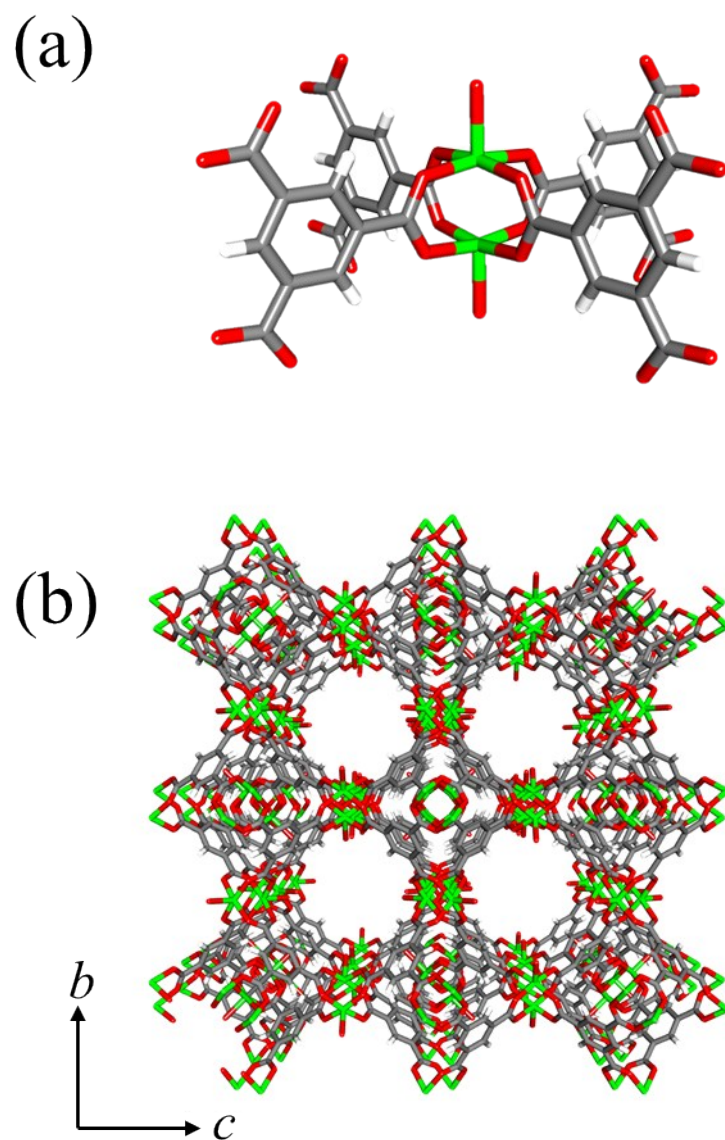

**Fig. S10.** Crystal structures of as-synthesized HKUST-1. (a) Local paddle wheel structure. (b) View of packing structure along the  $a$  axis. Atoms are colored as follows: Cu, green; O, red; C, gray; H, white.

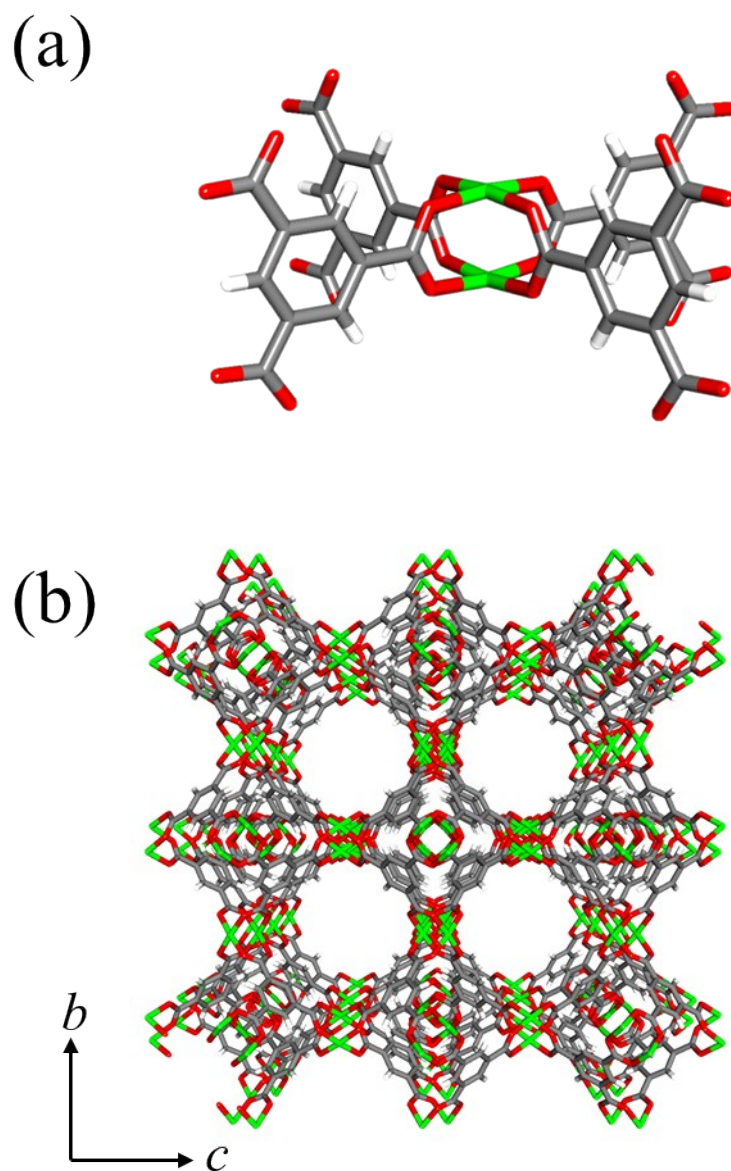

**Fig. S11.** Crystal structures of degassed HKUST-1. (a) Local paddle wheel structure. (b) View of packing structure along the  $a$  axis. Atoms are colored as follows: Cu, green; O, red; C, gray; H, white.

(a) Cu-Cu distance: 2.62 Å      (b) Cu-Cu distance: 2.49 Å      (c) Cu-Cu distance: 2.62 Å

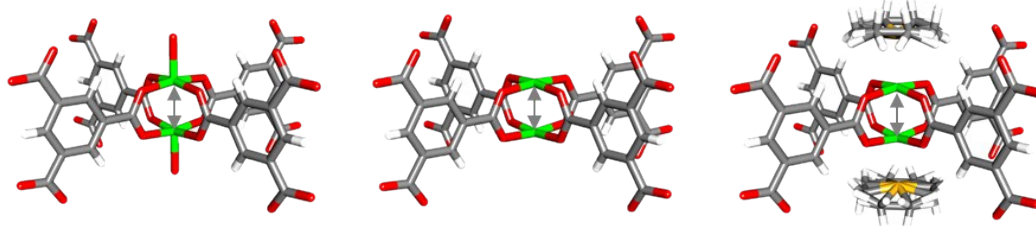

**Fig. S12.** Cu-Cu distance in the crystal structure of (a) as-synthesized HKUST-1, (b) degassed HKUST-1 and (c) DMS-adsorbed HKUST-1.

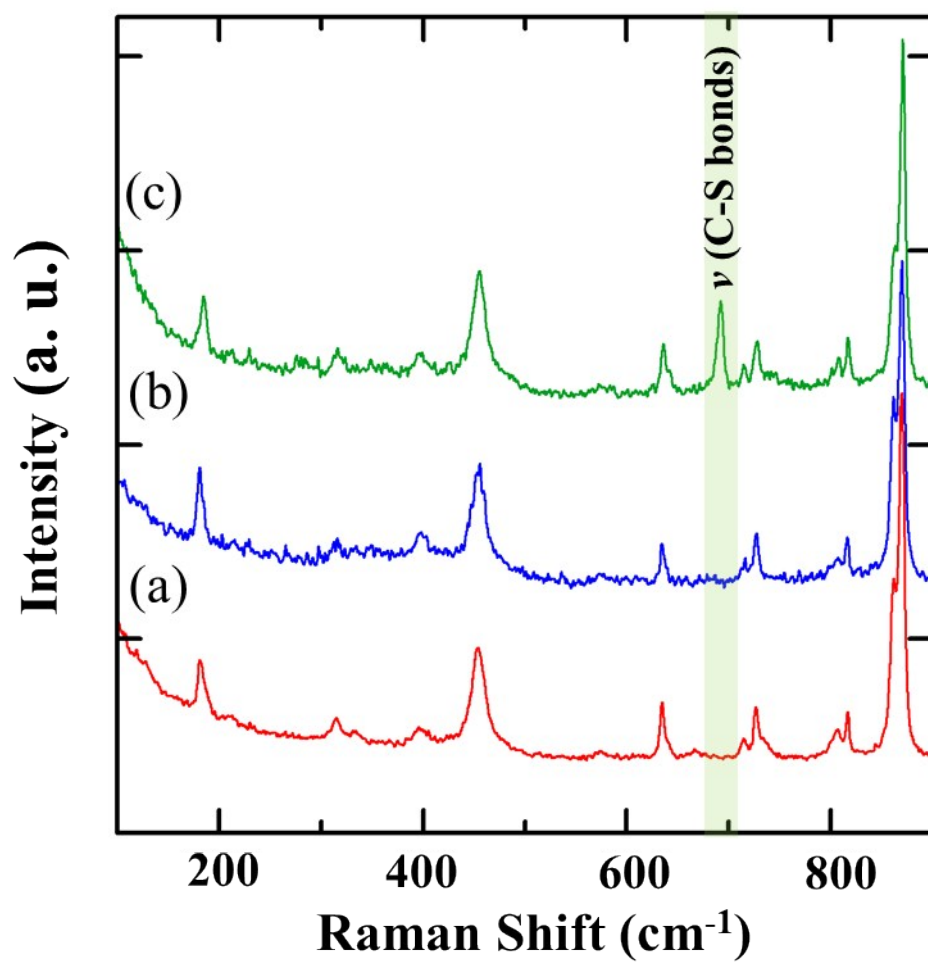

**Fig. S13.** Raman spectra of Cu-JAST-1 with DMS (2.3 vol. %)/Ar at room temperature: (a) as-synthesized, (b) degassed and (c) flowing DMS (2.3 vol.%) balanced by Ar.

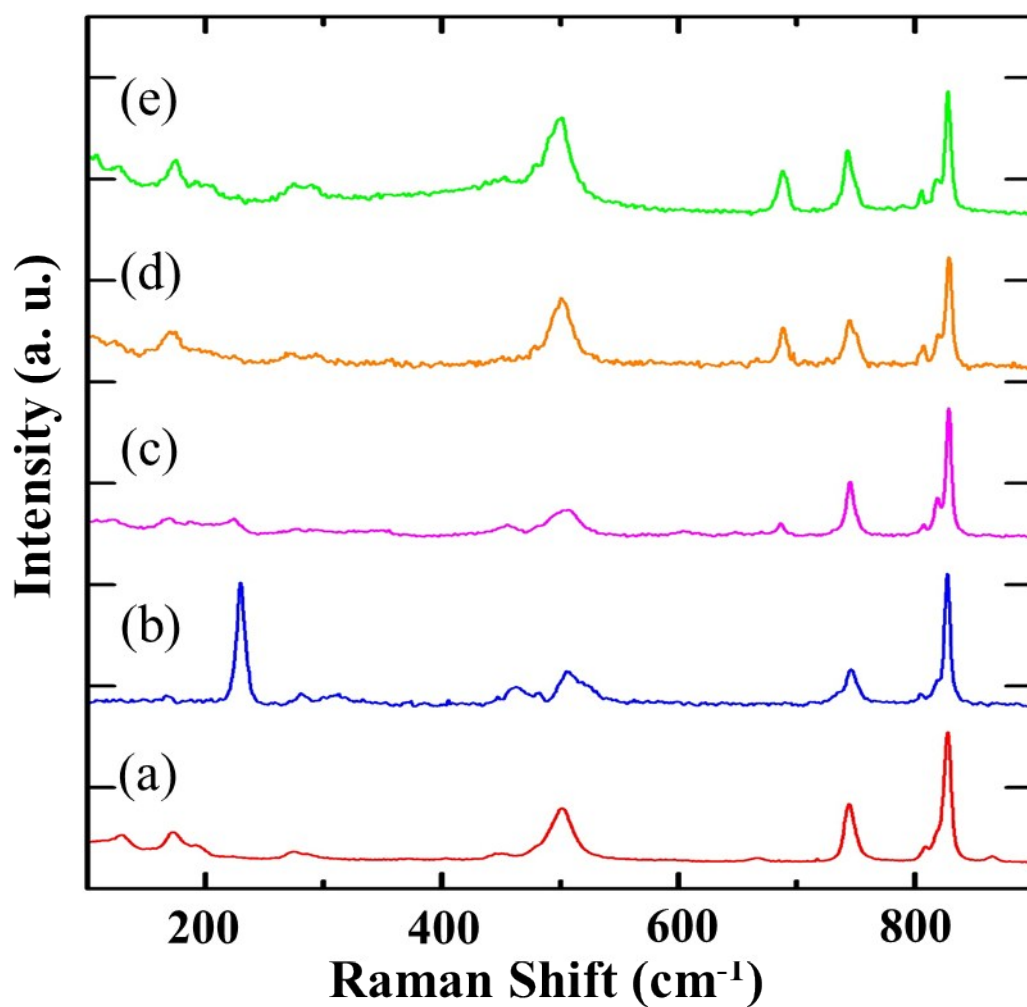

**Fig. S14.** Raman spectra of HKUST-1 with the flowed mixture gas of CH<sub>4</sub> (56.1 vol.%), Ar (42.5 vol.%), DMS (1.0 vol.%) and H<sub>2</sub>O (0.4 vol.%): (a) as-synthesized, (b) degassed, (c) flowing for 15 min, (d) flowing for 30 min and (e) flowing DMS (2.3 vol.%) balanced by Ar.

**Table S1.** Crystallographic parameters of (a) as-synthesized HKUST-1, (b) degassed HKUST-1 and (c) DMS-adsorbed HKUST-1.

|                            | (a)                                             | (b)                                             | (c)                                                                                          |
|----------------------------|-------------------------------------------------|-------------------------------------------------|----------------------------------------------------------------------------------------------|
| Formula                    | C <sub>6</sub> H <sub>2</sub> Cu O <sub>5</sub> | C <sub>6</sub> H <sub>2</sub> Cu O <sub>4</sub> | C <sub>376.85</sub> H <sub>362.54</sub> Cu <sub>48</sub> O <sub>192</sub> S <sub>44.42</sub> |
| Crystal system             | Cubic                                           | Cubic                                           | Cubic                                                                                        |
| Space group                | <i>Fm-3m</i>                                    | <i>Fm-3m</i>                                    | <i>Fm-3m</i>                                                                                 |
| <i>a</i> (Å)               | 26.3518(6)                                      | 26.2622(2)                                      | 26.3100(5)                                                                                   |
| <i>b</i> (Å)               | 26.3518(6)                                      | 26.2622(2)                                      | 26.3100(5)                                                                                   |
| <i>c</i> (Å)               | 26.3518(6)                                      | 26.2622(2)                                      | 26.3100(5)                                                                                   |
| $\alpha$ (°)               | 90                                              | 90                                              | 90                                                                                           |
| $\beta$ (°)                | 90                                              | 90                                              | 90                                                                                           |
| $\gamma$ (°)               | 90                                              | 90                                              | 90                                                                                           |
| <i>V</i> (Å <sup>3</sup> ) | 18299.1                                         | 18113.1                                         | 18212.2                                                                                      |
| <i>Z</i>                   | 48                                              | 48                                              | 1                                                                                            |
| Temperature (K)            | 203                                             | 203                                             | 203                                                                                          |
| <i>R</i> 1                 | 0.0284                                          | 0.0175                                          | 0.0320                                                                                       |
| <i>wR</i> 2                | 0.0948                                          | 0.0538                                          | 0.1203                                                                                       |
| GOF on F <sup>2</sup>      | 1.079                                           | 1.106                                           | 1.298                                                                                        |

## References

- S1. S. S.-Y. Chui, S. M.-F. Lo, J. P. H. Charmant, A. G. Orpen and I. D. Williams, *Science*, 1999, **283**, 1148-1150.
- S2. T. M. Tovar, J. Zhao, W. T. Nunn, H. F. Barton, G. W. Peterson, G. N. Parsons and M. D. LeVan, *J. Am. Chem. Soc.*, 2016, **138**, 11449-11452.
- S3. R. Matsuda, W. Kosaka, R. Kitaura, Y. Kubota, M. Takata and S. Kitagawa, *Micropor. Mesopor. Mater.*, 2014, **189**, 83-90.
- S4. S. Satokawa, Y. Kobayashi and H. Fujiki, *Appl. Catal. B*, 2005, **56**, 51-56.
